# Supplementary material for: Comparing the effectiveness and cost-effectiveness of sulfonylureas and newer diabetes drugs as second-line therapy for patients with type 2 diabetes
Source: PubMed Central journal article supplement (PMC11131106; doi:10.1136/bmjdrc-2023-003991), 2024-05-27

**Supplementary Tables S1. Diagnostic ICD-9-CM codes and ATC codes of drugs used in the current study.**

| <b>Diagnoses</b>                 | <b>ICD-9-CM codes</b>                                                               |
|----------------------------------|-------------------------------------------------------------------------------------|
| Uncontrolled diabetes            | 250.02; 250.12; 250.22; 250.32                                                      |
| Stroke                           | 430-435                                                                             |
| Heart failure                    | 428; 398.91; 402.01; 402.11; 402.91; 404.01; 404.03; 404.11; 404.13; 404.91; 404.93 |
| Myocardial infarction            | 410; 411.0; 412; V45.81; V45.82                                                     |
| Long-term diabetes complications | 250.4; 250.5; 250.6; 250.7; 250.8; 250.9                                            |
| Kidney diseases                  | 582; 585; 586; 588; 583.0; 583.1; 583.4; 583.7; 583.8; 584.6                        |
| Diabetic nephropathy             | 250.40; 250.42                                                                      |
| Respiratory diseases             | 460-519                                                                             |
| Cancer                           | 140-239                                                                             |
| Retinopathy                      | 362.0; 362.01; 362.02; 362.55; 361; 364.42; 365.63; 369                             |
| Depression                       | 296.2; 296.3; 296.82; 296.90; 298.0;                                                |
| <b>Drugs</b>                     | <b>ATC codes</b>                                                                    |
| Antidiabetic drugs               | A10B                                                                                |
| SGLT2i                           | A10BK; A10BD15; A10BD16; A10BD20                                                    |
| GLP-1-RA                         | A10BJ                                                                               |
| DPP-4i                           | A10BH; A10BD07; A10BD08; A10BD10; A10BD11; A10BD13; A10BD18;                        |
| Sulfonylureas                    | A10BB; A10BC; A10BD01; A10BD02; A10BD04; A10BD06                                    |
| Glinides                         | A10BX02; A10BX03; A10BX08; A10BD14;                                                 |
| Metformin                        | A10BA02                                                                             |
| Insulin                          | A10A                                                                                |
| Antihypertensive                 | C02; C03; C07; C08; C09; C10BX03; C10BX09                                           |
| Antiplatelet                     | B01AC; C10BX08; C10BX02; C10BX05; C10BX01; N02BA01                                  |
| Anticoagulant                    | B01AA; B01AE; B01AF                                                                 |
| Antidepressant                   | N06A                                                                                |
| NSAIDs                           | M01A                                                                                |
| Respiratory drugs                | R03                                                                                 |

**Supplementary Table S2.** Baseline characteristics of patients treated with second-line glinides and 2<sup>nd</sup> or 3<sup>rd</sup> generation sulfonylureas. Unmatched cohort.

|                                                               | Glinides<br>N = 2,739 | Second generation<br>sulfonylureas<br>N = 5,638 | Third generation<br>sulfonylureas<br>N = 2,200 |
|---------------------------------------------------------------|-----------------------|-------------------------------------------------|------------------------------------------------|
| Median follow-up (months)                                     | 60.7                  | 67.3                                            | 71.1                                           |
| Males                                                         | 1472 (53.7)           | 3080 (54.6)                                     | 1217 (55.3)                                    |
| Age categories                                                |                       |                                                 |                                                |
| <60                                                           | 210 (7.7)             | 1123 (19.9)                                     | 450 (20.5)                                     |
| 60–69                                                         | 522 (19.1)            | 1583 (28.1)                                     | 681 (30.9)                                     |
| 70–79                                                         | 1029 (37.6)           | 1982 (35.1)                                     | 731 (33.2)                                     |
| ≥80                                                           | 978 (35.7)            | 950 (16.9)                                      | 338 (15.4)                                     |
| Duration of treatment with metformin<br>at index date (years) |                       |                                                 |                                                |
| <5                                                            | 765 (27.9)            | 1668 (29.6)                                     | 722 (32.8)                                     |
| 5–9                                                           | 1230 (44.9)           | 2675 (47.4)                                     | 1029 (46.8)                                    |
| ≥10                                                           | 744 (27.2)            | 1295 (23.0)                                     | 449 (20.4)                                     |
| Co-treatments                                                 |                       |                                                 |                                                |
| Antihypertensive                                              | 2474 (90.3)           | 4577 (81.2)                                     | 1748 (79.4)                                    |
| Antiplatelet                                                  | 1338 (48.9)           | 1891 (33.5)                                     | 730 (33.2)                                     |
| Anticoagulant                                                 | 452 (16.5)            | 486 (8.6)                                       | 150 (6.8)                                      |
| Antidepressant                                                | 568 (20.7)            | 898 (15.9)                                      | 342 (15.5)                                     |
| Respiratory drugs                                             | 771 (28.2)            | 1300 (23.1)                                     | 473 (21.5)                                     |
| NSAIDs                                                        | 1017 (37.1)           | 2159 (38.3)                                     | 829 (37.7)                                     |
| Comorbidities                                                 |                       |                                                 |                                                |
| Stroke                                                        | 100 (3.7)             | 105 (1.9)                                       | 48 (2.2)                                       |
| Heart failure                                                 | 373 (13.6)            | 205 (3.6)                                       | 46 (2.1)                                       |
| Myocardial infarction                                         | 133 (4.9)             | 134 (2.4)                                       | 41 (1.9)                                       |
| Renal diseases                                                | 222 (8.1)             | 55 (1.0)                                        | 12 (0.6)                                       |
| Respiratory diseases                                          | 415 (15.2)            | 312 (5.5)                                       | 67 (3.1)                                       |
| Neurological diseases                                         | 17 (0.6)              | 19 (0.3)                                        | 8 (0.4)                                        |
| Retinopathy                                                   | 1 (0.0)               | 8 (0.1)                                         | 4 (0.2)                                        |
| Cancer                                                        | 258 (9.4)             | 327 (5.8)                                       | 99 (4.5)                                       |
| Depression                                                    | 14 (0.5)              | 16 (0.3)                                        | 7 (0.3)                                        |
| Multisource comorbidity score                                 |                       |                                                 |                                                |
| Low                                                           | 951 (34.7)            | 3393 (60.2)                                     | 1378 (62.6)                                    |
| Intermediate                                                  | 1333 (48.7)           | 1872 (33.2)                                     | 709 (32.2)                                     |
| High                                                          | 455 (16.6)            | 373 (6.6)                                       | 113 (5.1)                                      |

**Supplementary Table S3.** Association between second-line glinides and 2<sup>nd</sup> or 3<sup>rd</sup> generation sulfonylureas and primary clinical outcomes.

|                       | Second-line agent |                                 |                                |
|-----------------------|-------------------|---------------------------------|--------------------------------|
|                       | Glinides          | Second generation sulfonylureas | Third generation sulfonylureas |
| # patients            | 2,739             | 5,638                           | 2,200                          |
| MACE <sup>a</sup>     |                   |                                 |                                |
| # (%) of events       | 1,024 (46.0)      | 1,582 (30.1)                    | 599 (28.8)                     |
| HR (95% CI)           | Reference         | 0.93 (0.86-1.01)                | 0.91 (0.82-1.01)               |
| MACE new <sup>b</sup> |                   |                                 |                                |
| # (%) of events       | 317 (14.3)        | 557 (10.6)                      | 214 (10.3)                     |
| HR (95% CI)           | Reference         | 0.93 (0.80-1.07)                | 0.89 (0.74-1.06)               |
| All-cause death       |                   |                                 |                                |
| # (%) of events       | 1,137 (41.5)      | 1,276 (22.6)                    | 441 (20.1)                     |
| HR (95% CI)           | Reference         | 0.91 (0.84-0.99)                | 0.83 (0.74-0.93)               |

<sup>a</sup> Myocardial infarction, stroke, heart failure or all-cause deaths<sup>b</sup> Myocardial infarction, stroke or CV deaths

**Supplementary Table S4.** Association between second-line therapies and primary clinical outcomes according to the main analysis and selected sensitivity analyses, excluding glinides from the comparison group.

|                                                   | Second-line agent                                    |                  |                  |                  |
|---------------------------------------------------|------------------------------------------------------|------------------|------------------|------------------|
|                                                   | 2 <sup>nd</sup> /3 <sup>rd</sup><br>generation<br>SU | DPP-4i           | SGLT-2i          | GLP-1-RA         |
| <b>Main analysis</b>                              |                                                      |                  |                  |                  |
| # patients                                        | 1,001                                                | 1,001            | 1,001            | 1,001            |
| MACE <sup>a</sup>                                 |                                                      |                  |                  |                  |
| # (%) of events                                   | 180 (18.7)                                           | 139 (14.7)       | 124 (12.7)       | 130 (13.4)       |
| HR (95% CI)                                       | Reference                                            | 0.84 (0.65–1.07) | 0.75 (0.58–0.96) | 0.65 (0.51–0.84) |
| All-cause death                                   |                                                      |                  |                  |                  |
| # (%) of events                                   | 107 (10.7)                                           | 83 (8.3)         | 57 (5.7)         | 54 (5.4)         |
| HR (95% CI)                                       | Reference                                            | 0.78 (0.56–1.07) | 0.66 (0.46–0.93) | 0.47 (0.33–0.69) |
| <b>High dimensional propensity score approach</b> |                                                      |                  |                  |                  |
| # patients                                        | 1,088                                                | 1,088            | 1,088            | 1,088            |
| MACE <sup>a</sup>                                 |                                                      |                  |                  |                  |
| # (%) of events                                   | 217 (19.9)                                           | 200 (18.4)       | 147 (13.5)       | 154 (14.2)       |
| HR (95% CI)                                       | Reference                                            | 0.99 (0.80–1.21) | 0.75 (0.60–0.94) | 0.70 (0.56–0.88) |
| All-cause death                                   |                                                      |                  |                  |                  |
| # (%) of events                                   | 120 (11.0)                                           | 96 (8.8)         | 72 (6.6)         | 57 (5.2)         |
| HR (95% CI)                                       | Reference                                            | 0.88 (0.66–1.18) | 0.74 (0.54–1.01) | 0.46 (0.32–0.65) |
| <b>Probability-of-censoring weights approach</b>  |                                                      |                  |                  |                  |
| # patients                                        | 7,838                                                | 8,125            | 2,893            | 1,272            |
| MACE <sup>a</sup>                                 |                                                      |                  |                  |                  |
| # (%) of events                                   | 477 (6.1)                                            | 418 (5.1)        | 109 (3.8)        | 47 (3.7)         |
| HR (95% CI)                                       | Reference                                            | 0.71 (0.57–0.83) | 0.67 (0.48–0.94) | 0.67 (0.42–1.06) |
| All-cause death                                   |                                                      |                  |                  |                  |
| # (%) of events                                   | 1038 (13.2)                                          | 829 (10.2)       | 97 (3.4)         | 40 (3.2)         |
| HR (95% CI)                                       | Reference                                            | 0.80 (0.70–0.91) | 0.65 (0.49–0.86) | 0.63 (0.42–0.95) |
| <b>Different definition of MACE<sup>b</sup></b>   |                                                      |                  |                  |                  |
| # patients                                        | 1,001                                                | 1,001            | 1,001            | 1,001            |
| MACE <sup>b</sup>                                 |                                                      |                  |                  |                  |
| # (%) of events                                   | 90 (9.0)                                             | 82 (8.2)         | 71 (7.1)         | 63 (6.3)         |
| HR (95% CI)                                       | Reference                                            | 0.99 (0.72–1.37) | 0.88 (0.63–1.22) | 0.62 (0.44–0.89) |

<sup>a</sup> Composite outcome including myocardial infarction, stroke, heart failure or all-cause deaths

<sup>b</sup> Composite outcome including myocardial infarction, stroke or CV deaths

**Supplementary figures.****Supplementary Figure S1.** Flow-chart of cohort selection.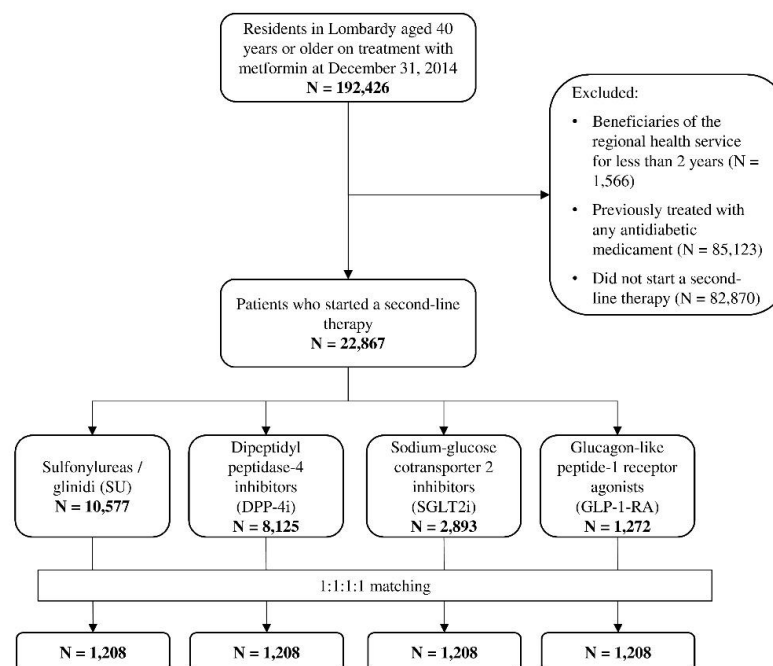

**Supplementary Figure S2.** Forest plot of Hazard Ratio (HR) and corresponding 95% Confidence Interval (CI) showing the effect of newer second-line agents relative to 2<sup>nd</sup>/3<sup>rd</sup> generation sulfonylureas and the risk of primary and secondary clinical outcomes estimated from the unmatched cohort.

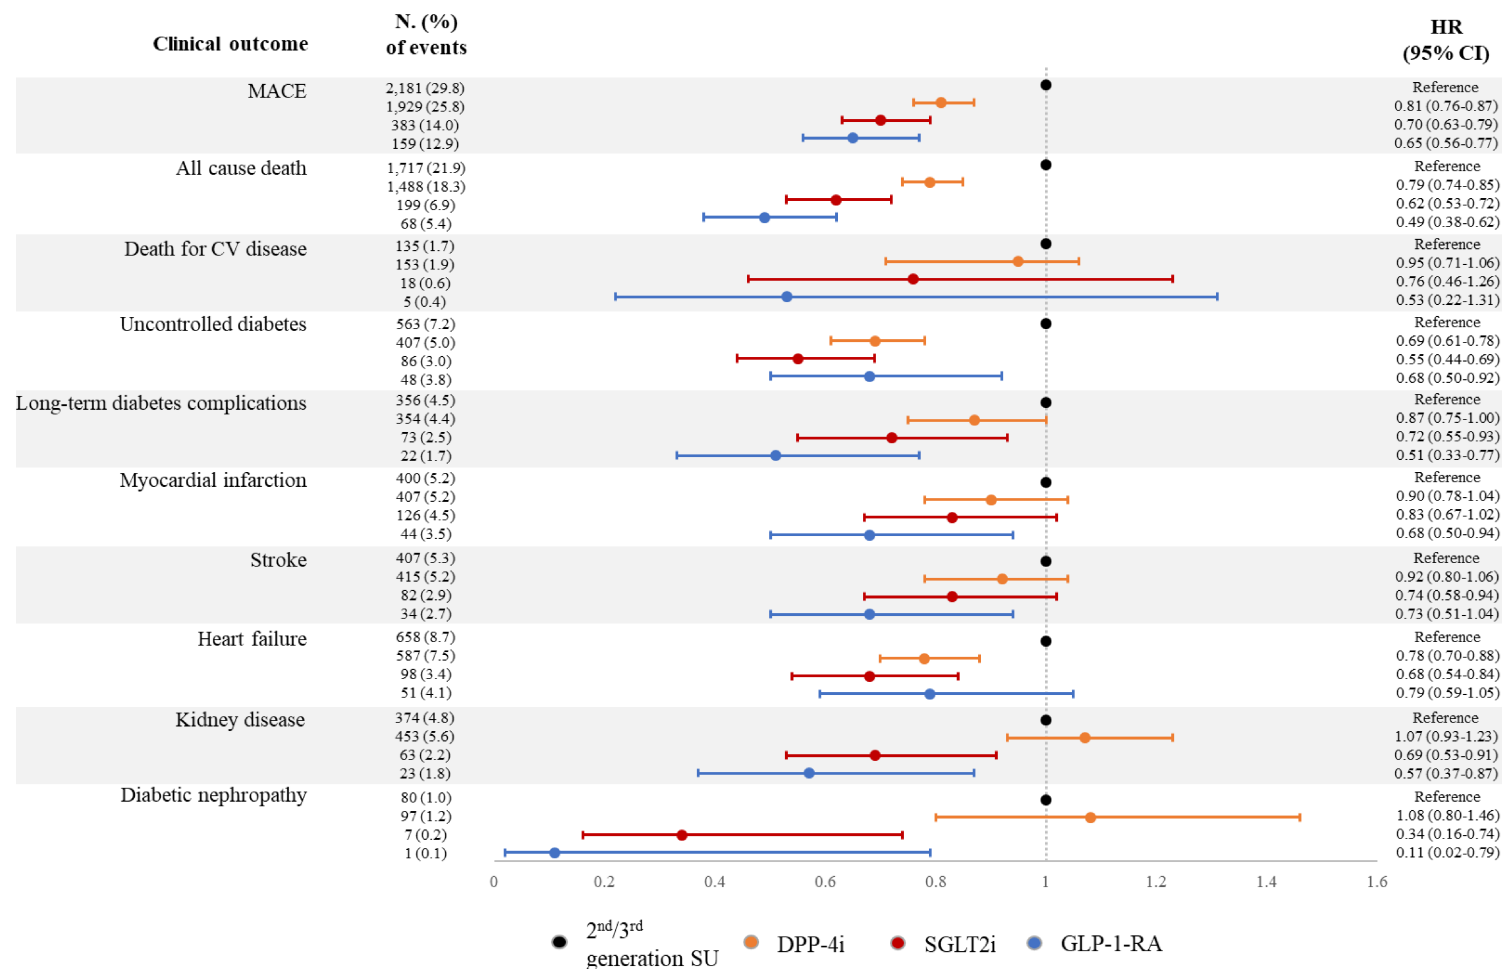

Supplement: bmjdrc-2023-003991supp001.pdf [file bmjdrc-2023-003991supp001.pdf]
